## REVIEW

# Stroke knowledge and awareness: an integrative review of the evidence

STEPHANIE P. JONES<sup>1</sup>, AMANDA J. JENKINSON<sup>2</sup>, MICHAEL J. LEATHLEY<sup>1</sup>, CAROLINE L. WATKINS<sup>1</sup>

<sup>1</sup>Clinical Practice Research Unit, University of Central Lancashire, Brook 417, Preston, Lancashire PR1 2HE, UK

<sup>2</sup>North West Ambulance Service, 449–451 Garstang Road, Broughton, Preston PR3 5LN, UK

Address correspondence to: S. Jones. Tel: +44-1772-895107. Email: sjones10@uclan.ac.uk

## Abstract

**Background:** the recognition of stroke symptoms by the public and activation of the emergency medical services (EMS) are the most important factors in instigating pre-hospital stroke care. Studies have suggested that poor recognition of the warning signs of stroke is the main cause of delay in accessing the EMS.

**Methods:** an integrative review of published studies about stroke knowledge and awareness was performed by searching online bibliographic databases, using keywords, from 1966 to 2008. Studies were included in the review if they focussed on risk factors, signs and symptoms, action and information. Each study was reviewed by two researchers (SJ and MJ).

**Results:** we identified 169 studies of which 39 were included in the review. The ability to name one risk factor for stroke varied between studies, ranging from 18% to 94% when asked open-ended questions and from 42% to 97% when asked closed questions. The ability to name one symptom ranged from 25% to 72% when asked open-ended questions and from 95% to 100% when asked closed questions. When asked what action people would take if they thought they were having a stroke, between 53% and 98% replied that they would call the EMS. People generally obtained information about stroke from family and friends. Older members of the population, ethnic minority groups and those with lower levels of education had consistently poor levels of stroke knowledge.

**Conclusions:** generally, levels of knowledge about recognising and preventing stroke were poor. Nevertheless, most participants stated they would contact the EMS at the onset of stroke symptoms.

**Keywords:** *cerebrovascular accident, awareness, symptom, risk factor, elderly*

## Background

Stroke is the third most common cause of mortality in the developed world and is also the leading cause of adult neurological disability. Due to ageing populations worldwide, it has been estimated that by 2020 stroke will be the leading cause of lost healthy life-years.

To combat the effects of stroke, the time from the onset of stroke symptoms to hospital arrival must be improved in order to provide timely and effective treatment. Many factors contribute to delays in seeking treatment for stroke, but the principal factor is believed to be a lack of public knowledge regarding stroke symptoms and the need for a rapid response [1, 2]. Studies have suggested that activation of emergency medical services (EMS) is one of the most important factors in instigating pre-hospital care [1] and that poor recognition of the symptoms of stroke may be partially responsible for delays in accessing the EMS [3, 4]. Achieving rapid patient presenta-

tion relies mainly on the public's ability to identify the symptoms and to contact the EMS without delay [5].

The purpose of this study was to systematically review and summarise the existing scientific literature exploring the knowledge of the public, stroke patients and carers in relation to the risk factors, symptoms, treatments and sources of information around stroke and transient ischaemic attack (TIA).

## Methods

### Search strategy

A search strategy (Appendix 3) was developed to search Medline from 1966 to 2008, and adapted to search EMBASE, CINAHL, AMED, Cochrane and ZETOC. Two researchers (SJ and MJ) independently reviewed the titles and abstracts of the articles identified by this search. Additional articles were

found by screening journals, citation tracking and hand searching. Any articles that appeared to meet the inclusion criteria were read in full.

### Inclusion criteria

Participants could be the general public, stroke patients and people at risk of stroke. The assessment questions used to test knowledge could be open-ended, closed or multiple choice. The method of administration of the questions could be through telephone, face-to-face or postal survey. We excluded studies that were only published as abstracts because of the limited data that could be extracted. The studies included in the review were categorised under one or more of the following topics: knowledge of risk factors for stroke, knowledge of stroke symptoms, action taken if stroke is suspected and sources of stroke information. We have used the descriptor stroke to mean stroke or TIA.

### Data extraction

We constructed two proformas. One proforma was used to record summary data for each article, including: period of study, participants, country, topic, and methodology of data capture; the second proforma recorded participants' knowledge on each topic.

### Results

From the electronic search, we identified 169 articles. Following screening of the title, abstract or complete article, 39 studies met the inclusion criteria. Of the studies, 30 tested participants' knowledge once. Nine studies tested knowledge before and after interventions that aimed to provide information about stroke. Five tested knowledge immediately after training; a further two also tested knowledge at 3 months. One study tested knowledge at a range of time points between 1 and 28 days post-intervention, and one tested knowledge at six separate time points over 3 years.

### Location of studies and types of participants

The 39 studies of public awareness of stroke/TIA are summarised in Table 1 (further details for each study are available in the table Appendix 2 in the supplementary data on the journal website <http://www.ageing.oxfordjournals.org/>). The published studies come from the following locations: UK ( $n=4$ ), Europe ( $n=8$ ), North America ( $n=20$ ), Asia ( $n=6$ ) and Australia ( $n=1$ ). In 28 studies, the participants were members of the general public; in four studies, the participants were stroke patients; and in three studies, knowledge was assessed in people at risk of stroke. One study assessed knowledge in relatives of non-stroke patients attending outpatient clinics. The remaining three studies involved a mixture of patients, the public, relatives and people at risk of stroke.

### Risk factors

The ability to name one or more risk factors for stroke differed markedly between studies and ranged between 18% [6] and 94% when open-ended questions were asked and from 42% to 97% [7] when closed questions were asked (Table 2). The ability to identify individual risk factors appeared to be strongly related to how the questions were asked. When asked open-ended questions about the main risk factor for stroke, only 36% identified high blood pressure. Other risk factors commonly identified without the prompt of a question included stress, diet, alcohol excess, inactivity, older age and smoking as causes of stroke. In contrast, when given options, >80% recognised high blood pressure, previous stroke and a family history of stroke as risk factors.

Regardless of how questions were asked, there was an association between the number of risk factors identified and the age of the participant. Approximately 50% of patients <65 years were aware of their own personal risk factors for stroke, compared with 30% of those aged  $\geq 65$  years [8]. In two separate studies, 72% [9] and 57% of people <75 years could name at least one stroke risk factor compared with 56% [9] and 19% of people aged  $\geq 75$  years. A third study also found that older age was significantly associated with the inability to name at least one risk factor [10].

Inadequate risk factor knowledge was also more common among African Americans [6, 11] and people with lower levels of education [2, 6, 11, 12].

### Signs and symptoms

The ability to name one symptom of stroke varied significantly between studies and ranged from 25% to 100%. The most commonly identified symptoms of stroke were numbness, weakness or paralysis, which ranged from 2% [13] to 97%; confusion, difficulty speaking or understanding speech, which ranged from 1% [13] to 100%; and dizziness, which ranged from 9% to 96%.

Similar to risk factor identification, recognition of stroke symptoms was poor when open-ended questions were used (Table 3). In one study, only 38% of participants could identify one or more symptoms when asked open-ended questions, compared with 100% when shown a list of possible symptoms. The ability of the public to name one symptom of stroke ranged from 25% to 72% when asked open-ended questions and from 95% to 100% [14] when asked closed questions.

As with risk factors, the respondent's age appeared to be associated with knowledge about stroke symptoms [2]. More participants aged 45–64 years (40%) were able to name at least two symptoms, compared with those aged  $\geq 65$  years (32%) [15]. Similarly, more patients <65 years (47%) knew a sign or symptom of stroke than those  $\geq 65$  years (28%), while symptom knowledge in those <70 years compared with those  $\geq 70$  years was 86% and 69%, respectively. In a further study, at least one warning sign could be named by 60%

Table 1. Summary of included studies

| Author         | Participants               | Sampling                                                                                          | N      | Response rate | Who did interviews                         | Questions <sup>a</sup> | Topic <sup>b</sup> | Method <sup>c</sup> | Notes <sup>d</sup> |
|----------------|----------------------------|---------------------------------------------------------------------------------------------------|--------|---------------|--------------------------------------------|------------------------|--------------------|---------------------|--------------------|
| Alkady [7]     | Public                     | Random                                                                                            | 1,172  | 56%           | Self completion                            | MC                     | RF; SaS; A         | Post                |                    |
| Al Shafae      | People at risk             | Random sample of people attending cardiology, neurology, diabetic and lipid clinics at a hospital | 400    | 72%           | Trained family practice                    | O                      | RF; SaS; A; I      | F2F                 |                    |
| Becker         | Public                     | Random                                                                                            | 547    | 87%           | ns                                         | O                      | RF; SaS; A         | Tel                 | Pre                |
| Carroll        | Public                     | Random                                                                                            | 511    | 84%           | ns                                         | O                      | RF; SaS; A; I      | F2F                 | Post               |
|                | Public                     | Visiting patients and relatives on non-medical wards                                              | 40     | ns            | Members of the neurology department        | O                      | RF; SaS; A; I      | F2F                 |                    |
|                | Patients                   | Admitted to hospital with stroke                                                                  | 40     | ns            | Members of the neurology department        |                        |                    |                     |                    |
|                | People at risk             | Consecutive patients attending outpatient appointments                                            | 40     | ns            | Members of the neurology department        |                        |                    |                     |                    |
| Cheung [17]    | Public                     | Random                                                                                            | 1,222  | 62%           | Trained interviewers                       | O; C                   | RF; SaS; A; I      | Tel                 |                    |
| Croqueolois    | Patients                   | Consecutive patients attending stroke outpatients clinic                                          | 164    | 43%           | ns                                         | O                      | RF                 | F2F                 |                    |
| Das [30]       | Public                     | Consecutive members of the public who visited hospital                                            | 4,660  | ns            | ns                                         | O                      | RF; SaS; I         | F2F                 |                    |
| DeLemos        | Patients                   | Stroke patients                                                                                   |        | ns            | ns                                         |                        |                    |                     |                    |
|                | Public                     | Convenience sample of public attending a community stroke screening programme                     | 186    | 47%           | Health professionals                       | MC                     | SaS; A             | F2F                 | Pre                |
|                |                            | Convenience sample of public attending a community stroke screening programme                     | 110    | 28%           | Health professionals                       |                        |                    | F2F                 | Post               |
|                |                            | Convenience sample of public attending a community stroke screening programme                     | 78     | 20%           | Health professionals                       |                        |                    | Tel                 | 3 months           |
| Ferris [16]    | Public                     | Random                                                                                            | 1,024  | 95%           | Professional interviewers                  | O; C                   | RF; SaS            | Tel                 |                    |
| Greenlund [27] | Public                     | Random                                                                                            | 61,019 | 53%           | ns                                         | O; C                   | SaS; A             | Tel                 |                    |
| Gupta          | Patients at increased risk | Consecutive patients attending a hospital clinic                                                  | 410    | ns            | Trained interviewer                        | O; C                   | RF; SaS            | F2F                 |                    |
| Handschu       | Public                     | Consecutive participants attending first aid training courses                                     | 532    | 87%           | St. Johns' Ambulance first aid instructors | O                      | SaS                | ns                  | 1–28 days post     |
| Hodgeson [19]  | Public                     | Random                                                                                            | 6,693  | ns            | ns                                         | O                      | SaS                | Tel                 | At six time points |
| Hux            | Public                     | Convenience sample of shoppers                                                                    | 190    | ns            | Trained interviewer                        | O; C                   | RF; SaS; A; I      | F2F                 |                    |
| Johnston [28]  | Public                     | Random                                                                                            | 10,112 | 89%           | ns                                         | O                      | SaS                | Tel                 |                    |
| Jurkowski [18] | Public                     | Random                                                                                            | 1,789  | 17%           | Professional survey research employees     | C                      | SaS; A             | Tel                 |                    |
| Kim [13]       | Public                     | Random                                                                                            | 1,000  | ns            | ns                                         | O                      | RF; SaS; A; I      | Tel                 |                    |
| Kothari        | Patients                   | Patients admitted to ED with suspected stroke                                                     | 163    | 94%           | Stroke research nurse                      | O                      | RF; SaS            | F2F                 |                    |
| Marx           | Public                     | Random                                                                                            | 507    | ns            | ns                                         | O; C                   | RF; SaS; A; I      | Tel                 | Pre                |
|                | Public                     | Random                                                                                            | 501    | ns            | ns                                         | O; C                   | RF; SaS; A         | Tel                 | Post               |
| Mikulik        | Public                     | Random                                                                                            | 592    | ns            | Professional interviewer                   | O; C                   | RF; SaS; A; I      | Tel                 |                    |

Table 1. (Continued)

| Author               | Participants                          | Sampling                                                       | N      | Response rate | Who did interviews                 | Questions <sup>a</sup> | Topic <sup>b</sup> | Method <sup>c</sup> | Notes <sup>d</sup> |
|----------------------|---------------------------------------|----------------------------------------------------------------|--------|---------------|------------------------------------|------------------------|--------------------|---------------------|--------------------|
| Morgan               | Public                                | Random sample from a GP practice                               | 139    | 57%           | Self completion                    | O; C                   | RF; SaS; A; I      | Post                |                    |
| Mosca                | Public                                | Random                                                         | 133    | 15%           | Professional interviewer           | O; MC                  | RF; SaS            | Tel                 |                    |
| Müller-Nordhorn [12] | Public                                | Random                                                         | 28,090 | 37%           | Self completion                    | O; MC                  | RF; I              | Post                |                    |
| Nedelchev            | Public                                | Random people on the street in a city                          | 422    | ns            | Medical students                   | O; C                   | RF; SaS; A; I      | F2F                 |                    |
| Pancioli [9]         | Public                                | Random                                                         | 1,880  | 71%           | Professional interviewer           | O                      | RF; SaS; A; I      | Tel                 |                    |
| Pandian              | Relatives of outpatients (not stroke) | Random                                                         | 942    | 75%           | ns                                 | O                      | RF; SaS; A; I      | F2F                 |                    |
| Pandian              | Patients; relatives                   | Consecutive stroke patients admitted to ED and their relatives | 147    | 85%           | Trained nurses and medical interns | O                      | RF; SaS            | ns                  |                    |
| Parahoo              | Public                                | Random                                                         | 869    | 46%           | Self completion                    | O; C                   | RF; SaS; A; I      | Post                |                    |
| Reeves [6]           | Public                                | Random                                                         | 2,512  | 45%           | ns                                 | O                      | RF; SaS; A         | Tel                 |                    |
| Rowe [13]            | Public                                | Random                                                         | 602    | 48%           | ns                                 | O; C; MC               | RF; SaS; A; I      | Tel                 |                    |
| Samsa [8]            | Patients at increased risk            | Identified as being at risk from inpatient records             | 1,261  | 43%           | Trained interviewer                | O                      | RF; I              | Tel                 |                    |
| Schneider [23]       | Public                                | Random                                                         | 1,880  | ns            | Professional interviewer           | O                      | RF; SaS            | Tel                 | Pre                |
| Segura [10]          | Public                                | Random                                                         | 2,173  | 69%           | Professional interviewer           | O                      | RF; SaS; A; I      | Tel                 | Post               |
| Silver [15]          | Public                                | Random                                                         | 3,000  | 18%           | Professional interviewer           | O; C                   | RF; SaS; A         | Tel                 |                    |
|                      | Public                                | Random                                                         | 1,514  | ns            | Professional interviewer           | O                      | SaS                | Tel                 | Pre                |
|                      | Public                                | Random                                                         | 1,619  | ns            | Professional interviewer           |                        |                    |                     | Post               |
| Stern [11]           | Public                                | Volunteers in independent settings                             | 657    | 100%          | Health professional                | MC                     | RF; SaS            | F2F                 | Pre                |
|                      | Public                                | Volunteers in independent settings                             | 657    | 100%          | Health professional                |                        |                    |                     | Post               |
| Wall                 | Public                                | Convenience sample from the MDPH Women's Health Network        | 34     | 100%          | Self completion                    | MC                     | SaS; A             |                     | Pre                |
|                      | Public                                | Convenience sample from the MDPH Women's Health Network        | 72     | 100%          | Self completion                    |                        |                    |                     | Post               |
|                      | Public                                | Convenience sample from the MDPH Women's Health Network        | 65     | 86%           | Self completion                    |                        |                    |                     | 3 months           |
| Weltermann           | Patient stroke groups                 | Random selection of stroke support groups                      | 133    | 96%           | Self completion                    | O; C                   | RF; SaS; A         | F2F                 |                    |
| Williams [22]        | Patients                              | Consecutive stroke patients admitted to three hospitals        | 67     | ns            | Investigator                       | O                      | SaS                | F2F                 |                    |
| Yoon [2]             | Public                                | Random                                                         | 1,278  | 62%           | Trained telephone interviewer      | O; C                   | RF; SaS; A; I      | Tel                 |                    |

ns, not stated. ED, Emergency Department.

<sup>a</sup>O, open-ended questions; C, closed questions; MC, multiple choice questions.

<sup>b</sup>RF, risk factors; SaS, signs and symptoms; A, action; I, information.

<sup>c</sup>Post, postal; F2F, face-to-face; Tel, telephone.

<sup>d</sup>Pre, pre-intervention; Post, post-intervention.

Table 2. Knowledge of risk factors for stroke

| Author               | HT <sup>a</sup> | Smoking | Age | Cholesterol | IHD <sup>b</sup> | DM <sup>c</sup> | AF <sup>d</sup> | Alcohol excess | Previous stroke/TIA | Stress | Diet | Inactivity | Family history | Obesity | Notes            |
|----------------------|-----------------|---------|-----|-------------|------------------|-----------------|-----------------|----------------|---------------------|--------|------|------------|----------------|---------|------------------|
| Al Shafae            | 35%             | 5%      | 2%  | 9%          | 11%              | 23%             | 0%              | 4%             | 1%                  | 0%     | 0%   | 3%         | 0%             | 6%      |                  |
| Carroll              | 20%             | 23%     | 0%  | 10%         | 0%               | 5%              | 8%              | 5%             | 0%                  | 18%    | 18%  | 3%         | 5%             | 5%      | Public           |
|                      | 33%             | 40%     | 3%  | 13%         | 10%              | 3%              | 0%              | 20%            | 0%                  | 20%    | 30%  | 5%         | 10%            | 23%     | Patients         |
|                      | 28%             | 50%     | 0%  | 8%          | 15%              | 0%              | 0%              | 10%            | 0%                  | 35%    | 28%  | 13%        | 8%             | 33%     | At risk          |
| Cheung [17]          | 90%             | 68%     | 53% | 75%         | 58%              | 60%             | 42%             | 84%            | 83%                 | na     | na   | na         | 50%            | 75%     |                  |
| Croquelois           | 47%             | 75%     | 0%  | 41%         | 0%               | 48%             | 0%              | 0%             | 0%                  | 0%     | 0%   | 0%         | 0%             | 0%      |                  |
| Das [30]             | 24%             | 24%     | 0%  | 11%         | 6%               | 25%             | 0%              | 24%            | 11%                 | 0%     | 0%   | 0%         | 0%             | 0%      | Public           |
|                      | 24%             | 24%     | 0%  | 15%         | 6%               | 19%             | 0%              | 21%            | 8%                  | 0%     | 0%   | 0%         | 0%             | 0%      | Patients         |
| Ferris [16]          | na              | na      | na  | na          | 89%              | na              | na              | na             | na                  | na     | na   | na         | na             | na      |                  |
| Gupta                | 48%             | 40%     | 0%  | 30%         | 11%              | 25%             | 0%              | 32%            | 5%                  | 52%    | 42%  | 0%         | 0%             | 15%     | O                |
|                      | 50%             | 40%     | Na  | 29%         | 20%              | 48%             | na              | 49%            | 29%                 | 62%    | 33%  | na         | na             | 32%     | C                |
| Hux                  | 48%             | 32%     | 0%  | 30%         | 8%               | 0%              | 0%              | 8%             | 0%                  | 10%    | 21%  | 10%        | 13%            | 20%     | O                |
|                      | 98%             | 95%     | Na  | 93%         | na               | 75%             | na              | 80%            | na                  | na     | na   | na         | na             | na      | C                |
| Kim [13]             | 29%             | 0%      | 4%  | 7%          | 0%               | 0%              | 0%              | 1%             | 0%                  | 7%     | 0%   | 0%         | 1%             | 7%      |                  |
| Kothari              | 44%             | 18%     | 0%  | 27%         | 3%               | 4%              | 0%              | 13%            | 0%                  | 36%    | 4%   | 0%         | 0%             | 5%      |                  |
| Marx                 | 95%             | 95%     | 59% | 0%          | 74%              | 67%             | 0%              | 0%             | 0%                  | 0%     | 0%   | 0%         | 0%             | 93%     | Pre <sup>e</sup> |
| Mikulik              | 29%             | 43%     | 0%  | 0%          | 2%               | 5%              | 0%              | 0%             | 4%                  | 31%    | 0%   | 0%         | 0%             | 33%     |                  |
| Morgan               | 94%             | 75%     | na  | na          | na               | na              | na              | 67%            | na                  | na     | 86%  | 76%        | na             | 67%     |                  |
| Müller-Nordhorn [12] | 43%             | 39%     | 1%  | 13%         | 2%               | 8%              | 0%              | 16%            | 0%                  | 18%    | 14%  | 20%        | 3%             | 34%     |                  |
| Pancioli [9]         | 49%             | 19%     | 0%  | 16%         | 5%               | 3%              | 0%              | 4%             | 0%                  | 23%    | 20%  | 0%         | 0%             | 16%     |                  |
| Pandian              | 45%             | 1%      | 0%  | 7%          | 2%               | 11%             | 0%              | 0%             | 0%                  | 41%    | 0%   | 2%         | 4%             | 3%      |                  |
| Pandian              | 54%             | 6%      | 9%  | 3%          | 5%               | 31%             | 0%              | 0%             | 0%                  | 12%    | 0%   | 0%         | 0%             | 1%      |                  |
| Parahoo              | 36%             | 24%     | 0%  | 0%          | 0%               | 0%              | 0%              | 0%             | 0%                  | 0%     | 0%   | 0%         | 0%             | 0%      |                  |
| Samsa [8]            | 94%             | 84%     | 63% | 76%         | 51%              | 31%             | na              | 61%            | 94%                 | 67%    | na   | 60%        | 84%            | 66%     |                  |
| Schneider [23]       | 51%             | 22%     | 0%  | 21%         | 5%               | 5%              | 0%              | 5%             | 0%                  | 21%    | 11%  | 11%        | 8%             | 18%     |                  |
| Segura [10]          | 92%             | 88%     | 68% | 84%         | 84%              | 59%             | na              | 90%            | na                  | 68%    | na   | 77%        | na             | 87%     |                  |
| Reeves [6]           | 32%             | 29%     | 4%  | 18%         | 5%               | 2%              | 0%              | 6%             | 0%                  | 27%    | 25%  | 26%        | 9%             | 18%     |                  |
| Rowe [14]            | 96%             | 89%     | na  | 90%         | 86%              | 69%             | na              | 83%            | 97%                 | na     | na   | 89%        | na             | 93%     |                  |
| Weltermann           | 82%             | 50%     | 0%  | 36%         | 9%               | 25%             | 0%              | 19%            | 0%                  | 0%     | 0%   | 0%         | 0%             | 0%      |                  |
| Yoon [2]             | 32%             | 39%     | 0%  | 14%         | 0%               | 0%              | 0%              | 21%            | 0%                  | 34%    | 32%  | 22%        | 22%            | 27%     |                  |
| Stern [11]           |                 |         |     |             |                  |                 |                 |                |                     |        |      |            |                |         |                  |
| Alkadry [7]          |                 |         |     |             |                  |                 |                 |                |                     |        |      |            |                |         |                  |
| Becker               |                 |         |     |             |                  |                 |                 |                |                     |        |      |            |                |         |                  |
| Mosca                |                 |         |     |             |                  |                 |                 |                |                     |        |      |            |                |         |                  |
| Nedeltchev           |                 |         |     |             |                  |                 |                 |                |                     |        |      |            |                |         |                  |

na, not applicable, where closed questions meant this was not an option.

<sup>a</sup>HT, hypertension.

<sup>b</sup>IHD, ischaemic heart disease.

<sup>c</sup>DM, diabetes mellitus.

<sup>d</sup>AF, atrial fibrillation.

<sup>e</sup>only pre-educational data were available for the individual risk factors.

of participants under <75years compared with 47% aged ≥75years [9]. Inadequate symptom knowledge was also more common among African Americans [6, 11, 16] and the Hispanic community [16].

## Action

When participants were asked what action they would take if they suspected the symptoms of stroke, between 27% and 100% stated that they would call the EMS [2, 6, 17] (Table 4). In one study involving participants who had actually had a stroke, only 18% had called EMS; the majority (80%) responded by calling their general practitioner. When asked how they would respond to each symptom without reference to stroke, more participants (42%) were likely to take action if they experienced weakness/paralysis compared with an ex-

perience of dizziness (3%) [2]. Older age was also shown to be associated with decreased likelihood to call 911 [18].

## Sources of information

In the 16 studies that asked participants to identify the main ways in which they had gained information about stroke, a variety of sources were cited. For any given source of information, there was often a big difference between studies in terms of the number of participants who had gained information from that source. A relative or friend was often cited as a source of information, but this ranged from 0% to 60% [9]. Health professionals were also a source of stroke information for many people ranging from 0% [13] to 51%. Personal experience was a source of information cited in five studies, with between 20% and 58% of participants

**Table 3.** Knowledge of signs and symptoms for stroke

| Author         | Sided numbness | Weakness | Paralysis | Speech disturbance | Confusion | Loss of coordination | Dizziness | Loss of vision | Consciousness | Headache | Vomiting | Motor | Notes <sup>a</sup>               |
|----------------|----------------|----------|-----------|--------------------|-----------|----------------------|-----------|----------------|---------------|----------|----------|-------|----------------------------------|
| Alkadry [7]    | 92%            | 0%       | 0%        | 88%                | 0%        | 0%                   | 0%        | 61%            | 0%            | 61%      | 0%       | 0%    |                                  |
| Al Shafae      | 7%             | 65%      | 65%       | 30%                | 0%        | 0%                   | 6%        | 3%             | 0%            | 3%       | 0%       | 26%   |                                  |
| Cheung [17]    | na             | 62%      | na        | 65%                | na        | 57%                  | na        | na             | 58%           | na       | na       | na    |                                  |
| Das [30]       | 22%            | 22%      | 0%        | 21%                | 21%       | 15%                  | 15%       | 11%            | 0%            | 10%      | 0%       | 0%    | Public Patients                  |
|                | 25%            | 25%      | 0%        | 22%                | 22%       | 20%                  | 20%       | 10%            | 0%            | 8%       | 0%       | 0%    |                                  |
| Ferris [16]    | 37%            | 0%       | 0%        | 26%                | 0%        | 0%                   | 20%       | 19%            | 0%            | 28%      | 0%       | 0%    |                                  |
| Greenlund [27] | 94%            | 94%      | na        | 88%                | 88%       | 86%                  | 86%       | 68%            | na            | 61%      | na       | na    |                                  |
| Hodgson [19]   | 0%             | 0%       | 49%       | 23%                | 0%        | 0%                   | 43%       | 24%            | 0%            | 29%      | 0%       | 0%    | Pre                              |
|                | 0%             | 0%       | 47%       | 31%                | 0%        | 0%                   | 55%       | 34%            | 0%            | 32%      | 0%       | 0%    | During                           |
|                | 0%             | 0%       | 46%       | 37%                | 0%        | 0%                   | 59%       | 34%            | 0%            | 34%      | 0%       | 0%    | Post                             |
|                | 0%             | 0%       | 44%       | 39%                | 0%        | 0%                   | 63%       | 44%            | 0%            | 36%      | 0%       | 0%    | During 2                         |
|                | 0%             | 0%       | 48%       | 41%                | 0%        | 0%                   | 63%       | 45%            | 0%            | 32%      | 0%       | 0%    | Post 2                           |
|                | 0%             | 0%       | 44%       | 34%                | 0%        | 0%                   | 56%       | 37%            | 0%            | 31%      | 0%       | 0%    | Post 3                           |
| Hux            | 33%            | 0%       | 0%        | 11%                | 0%        | 0%                   | 22%       | 12%            | 7%            | 16%      | 0%       | 11%   | O <sup>a</sup><br>C <sup>b</sup> |
|                | 90%            | 90%      | na        | 95%                | na        | Na                   | 96%       | 89%            | na            | 81%      | na       | na    |                                  |
| Johnston [13]  | 12%            | 12%      | 0%        | 5%                 | 0%        | 13%                  | 13%       | 9%             | 0%            | 0%       | 0%       | 0%    |                                  |
| Kim [13]       | 2%             | 0%       | 60%       | 2%                 | 1%        | 5%                   | 0%        | 1%             | 4%            | 0%       | 0%       | 0%    |                                  |
| Kochari        | 28%            | 34%      | 0%        | 28%                | 5%        | 35%                  | 15%       | 0%             | 0%            | 11%      | 0%       | 0%    |                                  |
| Marx           | 0%             | 43%      | 43%       | 25%                | 0%        | 6%                   | 0%        | 7%             | 0%            | 0%       | 0%       | 0%    |                                  |
| Mikulik        | 0%             | 34%      | 0%        | 37%                | 0%        | 0%                   | 0%        | 22%            | 20%           | 0%       | 0%       | 0%    |                                  |
| Morgan         | 81%            | 81%      | na        | 73%                | na        | 35%                  | 22%       | na             | 24%           | 27%      | 4%       | na    |                                  |
| Mosca          | 36%            | 36%      | 0%        | 10%                | 0%        | 0%                   | 10%       | 10%            | 0%            | 10%      | 0%       | 0%    |                                  |
| Pancioli [9]   | 11%            | 15%      | 0%        | 8%                 | 0%        | 0%                   | 24%       | 7%             | 0%            | 16%      | 0%       | 0%    |                                  |
| Pandian        | 0%             | 0%       | 62%       | 5%                 | 0%        | 6%                   | 0%        | 2%             | 6%            | 8%       | 0%       | 0%    |                                  |
| Pandian        | 5%             | 0%       | 62%       | 22%                | 0%        | 0%                   | 5%        | 1%             | 0%            | 5%       | 0%       | 0%    |                                  |
| Parahoo        | na             | 92%      | na        | 90%                | na        | 48%                  | na        | 42%            | 31%           | 25%      | na       | na    |                                  |
| Reeves [6]     | 46%            | 46%      | 0%        | 30%                | 30%       | 24%                  | 24%       | 14%            | 0%            | 15%      | 0%       | 0%    | O                                |
| Rowe [14]      | 24%            | 24%      | 0%        | 14%                | 0%        | 10%                  | 10%       | 5%             | 0%            | 8%       | 0%       | 0%    | C                                |
|                | 95%            | 95%      | na        | 63%                | na        | 90%                  | 90%       | 77%            | na            | 77%      | na       | na    |                                  |
| Schneider [23] | 36%            | 20%      | 0%        | 16%                | 0%        | 0%                   | 26%       | 13%            | 0%            | 19%      | 0%       | 0%    |                                  |

Table 3. (Continued)

| Author        | Sided numbness | Weakness | Paralysis | Speech disturbance | Confusion | Loss of coordination | Dizziness | Loss of vision | Consciousness | Headache | Vomiting | Motor | Notes <sup>a</sup>                                                                                         |
|---------------|----------------|----------|-----------|--------------------|-----------|----------------------|-----------|----------------|---------------|----------|----------|-------|------------------------------------------------------------------------------------------------------------|
| Segura [10]   | 69%            | 88%      | na        | 80%                | na        | na                   | 75%       | 70%            | 80%           | 79%      | na       | na    |                                                                                                            |
| Wältermann    | 21%            | 0%       | 0%        | 57%                | 0%        | 0%                   | 0%        | 31%            | 11%           | 0%       | 0%       | 65%   |                                                                                                            |
| Yoon [2]      | 16%            | 4%       | 9%        | 14%                | 0%        | 0%                   | 21%       | 24%            | 0%            | 22%      | 0%       | 0%    |                                                                                                            |
| Gupta         |                |          |           |                    |           |                      |           |                |               |          |          |       |                                                                                                            |
| Stern [11]    |                |          |           |                    |           |                      |           |                |               |          |          |       |                                                                                                            |
| Williams [22] |                |          |           |                    |           |                      |           |                |               |          |          |       |                                                                                                            |
| Nedeltshev    |                |          |           |                    |           |                      |           |                |               |          |          |       |                                                                                                            |
| Carroll       |                |          |           |                    |           |                      |           |                |               |          |          |       |                                                                                                            |
| Becker        |                |          |           |                    |           |                      |           |                |               |          |          |       | Public<br>People at risk<br>Pre<br>Post                                                                    |
| DeLemos       |                |          |           |                    |           |                      |           |                |               |          |          |       | Pre<br>Post<br>3 months<br>Pre<br>Post                                                                     |
| Handschu      |                |          |           |                    |           |                      |           |                |               |          |          |       |                                                                                                            |
| Silver [15]   |                |          |           |                    |           |                      |           |                |               |          |          |       | Pre: print<br>Pre: LLTV<br>Pre: HLTV<br>Pre: cont<br>Post: print<br>Post: LLTV<br>Post: HLTV<br>Post: cont |

82% of patients gave correct responses, the commonest symptom reported was weakness

Groups who received both pre-test and post-test education had a significant increase in knowledge, mean 11%

Patients with previous stroke (76%) were as likely as those without stroke (88%) to think their symptoms were not serious

Data extraction on individual symptoms not possible

Median symptoms identified: 2

Median symptoms identified: 2

Number knowing >1 symptom: 39%

Number knowing >1 symptom: 46%

59% recognised three warning symptoms: numbness on one side, difficulty talking or understanding, difficulty with vision

94% recognised three warning symptoms: numbness on one side, difficulty talking or understanding, difficulty with vision

77% recognised three warning symptoms: numbness on one side, difficulty talking or understanding, difficulty with vision

Mean number of stroke symptoms named: 1.5

Mean number of stroke symptoms named: 3.3

Mean symptoms: 1.25; name two or more: 42%

Mean symptoms: 1.28; name two or more: 39%

Mean symptoms: 1.32; name two or more: 40%

Mean symptoms: 1.38; name two or more: 44%

Mean symptoms: 1.17; name two or more: 41%

Mean symptoms: 1.47; name two or more: 50%

Mean symptoms: 1.66; name two or more: 54%

Mean symptoms: 1.10; name two or more: 36%

na, not applicable, where closed questions meant this was not an option.

<sup>a</sup>O, open questions; C, closed questions; LLTV, low level television campaign; HLTV, high-level television campaign.

Table 4. Action that should be taken if a stroke is suspected

| Author         | 911                                                                                                                                     | Call GP/Dr | Go to Dr | Call Hospital | Direct to hospital | Call for help | Seek medical attention | Family & friends & neighbours | Buy medicine from a shop | Do nothing | Don't know | Notes          |
|----------------|-----------------------------------------------------------------------------------------------------------------------------------------|------------|----------|---------------|--------------------|---------------|------------------------|-------------------------------|--------------------------|------------|------------|----------------|
| Alkadry [7]    | 94%                                                                                                                                     | na         | na       | na            | 94%                | na            | na                     | na                            | na                       | na         | na         |                |
| Al Shafae      | na                                                                                                                                      | na         | na       | na            | 73%                | na            | na                     | na                            | na                       | na         | na         |                |
| Becker         | 68%                                                                                                                                     | 0%         | 0%       | 0%            | 0%                 | 0%            | 0%                     | 0%                            | 0%                       | 0%         | 0%         | Pre            |
|                | 64%                                                                                                                                     | 0%         | 0%       | 0%            | 0%                 | 0%            | 0%                     | 0%                            | 0%                       | 0%         | 0%         | Post           |
| Carroll        | 80%                                                                                                                                     | 20%        | 0%       | 0%            | 5%                 | 0%            | 0%                     | 0%                            | 0%                       | 0%         | 0%         | Public         |
|                | 18%                                                                                                                                     | 80%        | 0%       | 0%            | 0%                 | 0%            | 0%                     | 0%                            | 0%                       | 0%         | 0%         | Patients       |
|                | 73%                                                                                                                                     | 28%        | 0%       | 0%            | 0%                 | 0%            | 0%                     | 0%                            | 0%                       | 0%         | 0%         | People at risk |
| Cheung [17]    | 49%                                                                                                                                     | 14%        | 0%       | 0%            | 29%                | 0%            | 0%                     | 0%                            | 0%                       | 0%         | 0%         |                |
| DeLemos        | 47%                                                                                                                                     | na         | na       | na            | na                 | na            | na                     | na                            | na                       | na         | na         | Pre            |
|                | 98%                                                                                                                                     | na         | na       | na            | na                 | na            | na                     | na                            | na                       | na         | na         | Post           |
| Mikulik        | 27%                                                                                                                                     | 33%        | na       | na            | na                 | na            | na                     | na                            | na                       | 10%        |            |                |
| Nedeltchev     | 64%                                                                                                                                     | 36%        | 0%       | 0%            | 0%                 | 0%            | 0%                     | 0%                            | 0%                       | 0%         | 0%         |                |
| Pandian        | 0%                                                                                                                                      | 15%        | 10%      | 0%            | 71%                | 0%            | 0%                     | 0%                            | 0%                       | 0%         | 5%         |                |
| Parahoo        | 53%                                                                                                                                     | 42%        | 0%       | 0%            | 0%                 | 0%            | 0%                     | 2%                            | 0%                       | 0%         | 0%         |                |
| Reeves         | 79%                                                                                                                                     | 3%         | 0%       | 0%            | 4%                 | 0%            | 0%                     | 0%                            | 0%                       | 0%         | 4%         |                |
| Rowe [14]      | 70%                                                                                                                                     | 4%         | 26%      | 18%           | 9%                 | 37%           | 9%                     | 0%                            | 0%                       | 0%         | 5%         |                |
| Schneider [23] | 74%                                                                                                                                     | 0%         | 0%       | 0%            | 0%                 | 0%            | 0%                     | 0%                            | 0%                       | 1%         | 0%         |                |
| Segura [10]    | 45%                                                                                                                                     | 41%        | 13%      | na            | na                 | na            | na                     | na                            | na                       | 1%         | na         |                |
| Weltermann     | na                                                                                                                                      | 31%        | na       | na            | 64%                | na            | na                     | na                            | na                       | 4%         | 2%         |                |
| Yoon [2]       | 67%                                                                                                                                     | 10%        | 9%       | 0%            | 23%                | 0%            | 0%                     | 0%                            | 0%                       | 2%         | 2%         |                |
| Greenlund [27] | 86% would call 911 if someone was having a heart attack or stroke                                                                       |            |          |               |                    |               |                        |                               |                          |            |            |                |
| Marx           | Pre-intervention 81% would call EMS, post-intervention 82% would call EMS                                                               |            |          |               |                    |               |                        |                               |                          |            |            |                |
| Morgan         | 96% thought it was extremely important; 3% thought it might be important and 1% thought it was not important to get immediate treatment |            |          |               |                    |               |                        |                               |                          |            |            |                |
| Wall           | 99% would dial 999 following an educational intervention; this declined to 97% at 3months post-intervention                             |            |          |               |                    |               |                        |                               |                          |            |            |                |

na, not applicable, where closed questions meant this was not an option.

gaining information about stroke through knowing a stroke survivor or their family.

A variety of media were identified as sources of stroke information. Television was cited as a source of information in all 16 studies, ranging from 1% to 82% [12], while radio was cited in nine studies. Literature, including books, magazines, pamphlets and newspapers, provided information for between 3% and 82% [12] of participants.

Gaining information through stroke campaigns was only identified in two studies by 3% and 27% of participants. Information gained from schools was identified in four studies by 2–16% [13] of participants. The Internet and public libraries were the least accessed sources of stroke information, cited in only three studies by 1–3% of participants.

### Patients and those at risk

Ten (26%) papers included patients or those at higher risk of stroke. These studies still demonstrated that participants had a wide range of knowledge, with as many as 94% [8] and as few as 24% [30] of participants identifying hypertension as a major risk factor for stroke. The method of questioning was the same for both studies [8, 30]. Knowledge of the main symptoms of stroke was equally wide ranging, with between 0% and 65% recognising weakness and between 21% [30] and 57% identifying speech disturbance as stroke symptoms. These figures are within the ranges identified by members of the general public and suggest that having either experience of or being at risk of stroke does not appear to translate into an increase in stroke knowledge. One study did show that on-

ly 18% of patients sought help by calling an ambulance, but that there was a difference in the proportions calling an ambulance when stroke was recognised (25%) compared with when stroke was not recognised (13%).

As with the overall findings, the age of the patient or person at risk showed an association with knowledge. Approximately 50% of patients <65 years were aware of their own personal risk factors for stroke, compared with 30% of those ≥65 years [8]. Similarly, more patients <65 years (47%) knew a sign or symptom of stroke than those ≥65 years (28%). Symptom knowledge in those <70 years compared with those ≥70 years was 86% and 69%, respectively.

### TIA

Only two studies looked specifically at knowledge related to TIA [28]. In one study, only 8% recognised TIA as symptoms of stroke resolving within 24h and only 3% identified TIA as a disease that requires immediate medical help. In the other study, only 8% correctly identified the definition of TIA and only 9% could identify a typical symptom [28]. The term TIA was unfamiliar to 87% of participants. There were insufficient data to compare knowledge between people who have had a stroke and those with TIA.

### Intervention studies

Nine studies used a pre- and post-test design. In the studies, the interventions were different types of public awareness campaigns. The impact of the interventions was assessed



in terms of the participants' knowledge rather than looking at actual health behaviour or other patient outcomes. In communities exposed to television and newspaper advertising, the numbers able to name the symptoms of stroke increased significantly from 24% to 27% [19] and from 39% to 46%. In a separate study, communities were exposed to either a television campaign or print advertising. There was no significant change in the community receiving newspaper advertising (42–40%), but in the community receiving television advertising, 54% of people were able to identify two or more symptoms compared with 40% at baseline [15]. Intermittent, low-level advertising was as effective as continuous, high-level advertising [15]. Prior to a stroke screening and education programme, 59% of participants were able to recognise weakness or numbness on one side, difficulty talking or understanding speech, and difficulty with vision, as symptoms of stroke. Immediately following the intervention, this increased to 94%, falling to 77% when knowledge was tested 3 months later. An animation to teach members of the public about the Face Arm Speech Test (FAST) found that, immediately after the intervention, 99% compared with 92% before the intervention were able to recognise facial droop as a symptom of stroke. Similarly, 97% were able to identify arm weakness or numbness after the intervention compared with 86% before the intervention. At 3 months after the intervention, 100% recalled slurred speech and 98.5% recalled arm weakness or numbness as a symptom of stroke; however, the number of participants who could remember all three components of the FAST had declined from 100% to 79%. A campaign that involved mass media, poster adverts, flyers and public events showed no significant change in knowledge about symptoms, risk factors or actions.

A professionally produced community slide/audio education programme was delivered to 657 adults [11]. Mean pre- and post-test scores increased from 69% to 79%. No benefit was seen if there was a facilitated discussion within the programme [11]. Following a first aid training course about stroke that was delivered over a whole day or in six 90-min sessions, the ability of participants to identify the symptoms of stroke increased from a mean of 1.5 symptoms to 3.4.

## Discussion

To our knowledge, this is the first systematic review that has synthesised the published literature around knowledge of risk factors for stroke, knowledge of stroke symptoms, action taken if stroke is suspected and sources of stroke information. A previous review published in 2005 only addressed risk factor and symptom knowledge in a limited number of studies [20].

This review includes four studies from the UK. Hypertension and smoking were the main risk factors identified by participants across the studies. Knowledge of hypertension as a risk factor ranged from 20% to 94% and smoking from 23% to 75%; the range of these figures is more a reflection of the use of open and closed questions. One study found

that stroke patients' awareness was poor, with only 40% having identified that they were having a stroke. A family member was often the first person who was contacted by the patient and in 68% of cases it was the family member who then sought help from a health professional. Furthermore, the GP was the health professional contacted (80% of cases) rather than dialling 999 (18% of cases). When members of the general public were questioned, 42% said they would contact their GP if stroke was suspected while 53% stated they would contact the ambulance service. The data from the UK studies of stroke knowledge are similar to the data from other countries.

A lack of stroke knowledge among those who have already suffered a stroke is particularly worrying. There may be a number of possible explanations as to why this is the case. The content of information that was imparted may not be appropriate for some patients, in that it may be too complicated or too general [21]. Some patients may be unable to retain the information given to them for a variety of reasons [21].

Participants who had experienced a stroke initially did not take their symptoms seriously and had waited for their symptoms to abate [22]. Most did not know that they were experiencing stroke symptoms.

When asked what action they would take if they suspected that they or a relative were experiencing a stroke, at least 47% of participants stated that they would call the EMS or would visit a hospital emergency department. However, when stroke patients were asked about what they had actually done at the onset of symptoms, only 18% had actually called the emergency services.

This paradox between what people say they would do and what they actually do shows the limitation of simply asking questions. In the ideal world, questioning would simulate a 'real life' situation of having the stroke event because complex factors such as knowledge, emotions and fears are often considered in deciding what action should be taken. Questions that only assess knowledge do reveal that many people know what they should do. Our task is to determine how best to translate this knowledge into the appropriate action and to test out what works best and for whom. This is difficult at the present time because knowledge of stroke was not uniform across the populations studied. Perhaps this is why identifying the key components needed for an effective campaign aimed at reducing the delay in diagnosing and managing stroke is one of the top 10 priorities for stroke services research.

Improving public awareness about the signs of stroke was a key element of the UK Government's National Stroke Strategy. Consequently, the Department of Health is running a 3-year campaign aimed at raising public awareness of stroke. The findings from our review could be used to inform the campaign in terms of who should be targeted, how the information should be delivered and how often the message should be delivered. Our work has shown that older people and some minority groups tended to have less knowledge whilst at the same time being some of the most at risk groups. So while a general campaign covers a majority of the popula-

tion, it may be necessary to run campaigns that use media and language more appropriate to certain groups. The current campaign has used television and this has been shown to be effective [15]. However, the effect of awareness campaigns can be time limited and so it would be important to repeat the message. It has been suggested that intermittent, low-level advertising is as effective as continuous, high-level advertising [15]. Our findings suggest that the awareness campaign will need repeating, with an optimal time frame being around 3 months after the delivery of the first part of the campaign.

Those with lower levels of education [2, 6, 7] have consistently shown poor levels of stroke knowledge. Participants who had higher levels of education were more likely to name at least one symptom of stroke [7] or risk factor or to provide a correct explanation of the physiological processes of stroke. Higher levels of education and upper socio-economic status have also been associated with the ability to identify the brain as the organ affected by stroke. Other factors that affected knowledge were age and ethnicity. Older age groups had poorer knowledge of the risks factors [8, 9, 23] and symptoms of stroke [2, 9, 15, 23]. Inadequate risk factor knowledge was also more common among African Americans [6, 11, 16] and Hispanics [16].

These findings have parallels in other health topics where inadequate knowledge about a condition or service is often lower among ethnic minority groups and the less well educated [24]. For example, Caucasian women with some college education were more knowledgeable about breast cancer risk factors, symptoms, detection methods and treatment compared with people who had lower levels of education, or who were from ethnic minority groups. Ethnic minority groups have also been shown to be less likely to know about diabetes services available to them [24]. Why these particular groups have poorer levels of health knowledge is not fully understood.

Only one paper reported knowledge about treatment that could be given to stroke patients to break up blood clots [16]. Awareness of thrombolytic therapy was higher among Caucasians compared to Black or Hispanic respondents (92% versus 84% and 79%, respectively) [16].

### **Best way to educate**

The next question is how to educate people. The review suggests that a television and newspaper advertising campaign improved recognition of stroke symptoms, whereas a newspaper campaign alone had no effect on symptom knowledge [15]. The most effective way to increase knowledge about stroke has been in stroke screening, educational programmes and first aid training [11]. Educational tools have also been shown to increase stroke awareness across diverse populations [11]. While it is appreciated that increasing knowledge does not necessarily lead to a change in behaviour, an increase in knowledge may facilitate behaviour change [25]. In order for us to increase knowledge and change behaviour, we need to consider which factors about stroke shape people's behaviours.

### **Health behaviour**

Symptom recognition can be a major problem when studying illness behaviour, as symptoms often vary greatly from person to person. This has an obvious impact upon the clarity of cues to taking help-seeking action. The interpretation of symptoms may also vary according to situational influences [26]. Health action is influenced by an individual's state of readiness, beliefs shaped by personal, social and situational sources, as well as cues to action [25]. Programmes of health education should aim to minimise barriers to health services and provide cues to action [25]. Large proportions of people may be in a state of readiness but lack the information or the cues required to take appropriate action [25]. Public awareness programmes need to take into account levels of health knowledge in order to provide the information and cues that are necessary to influence behaviour [25]. This is particularly important in stroke given our findings that knowledge is dependent on variables such as age and ethnicity.

### **Limitations of the studies included**

While telephone interviews were conducted, this approach to data collection excluded people with cognitive or communication deficits [27] and those who did not speak English [28]. Whilst risk factor identification and the recognition of stroke symptoms were often poor when open-ended questions were used, this appeared to improve when closed questions were asked. However, knowledge and awareness may have been overestimated by aided questions. Stroke awareness and knowledge may be more successfully evaluated using partially aided questions or vignettes to simulate more closely the situation of a person with a suspected stroke.

### **Limitations of the review**

Our search may not have been exhaustive, but by combining several search strategies we suggest that most studies to date have been identified and included in this review. The review was limited to published studies, and publication bias may have influenced the results. This review focuses on studies that have evaluated knowledge of stroke and TIA. Although two studies evaluated the effects of a public education programme, other preventative programmes (reduction of blood pressure, smoking cessation programmes, exercise on prescription and healthful eating programmes) that may be used in conjunction with other conditions and diseases have not been included.

### **Summary**

This review highlights the importance of increasing public awareness about stroke symptoms, risk factors and the emergency response that is required. Public awareness and education campaigns should be targeted towards those at risk of stroke, older members of the general population, eth-

nic minority groups and those with lower levels of education. These groups generally have lower levels of stroke knowledge, and yet stroke disproportionately impacts upon these groups [29]. There is a need for future research that identifies which interventions not only increase knowledge but also influence behaviour, and in what populations these interventions have the most impact.

## Key points

- The most effective way to increase knowledge about stroke has been in stroke screening, educational programmes and first aid training.
- Levels of stroke knowledge are associated with age, education and ethnicity.
- Educational campaigns should target those groups who consistently demonstrate poorer knowledge of stroke.
- Asking questions may test knowledge, but they do not appear to reflect what a person does in real life, suggesting that alternative methods of testing knowledge need to be explored.

## Acknowledgements

None.

## Conflicts of interest

None.

## Funding

Funding for this review was provided by Cumbria and Lancashire Strategic Health Authority.

## Supplementary data

Supplementary data are available at *Age and Ageing* online.

The very long list of references supporting this review has meant that only the most important are listed here. The remaining references are available on the journal website <http://www.ageing.oxfordjournals.org/> as Appendix 1.

## References

1. Evenson KR, Rosamond WD, Morris DL. Pre-hospital and in-hospital delays in acute stroke care. *Neuroepidemiology* 2001; 20: 65–76.
2. Yoon SS, Heller RF, Levi C, Wiggers J, Fitzgerald PE. Knowledge of stroke risk factors, warning symptoms and treatment among an Australian urban population. *Stroke* 2001; 32: 1926–30.
3. Jorgensen HS, Nakayama H, Reith J, Raaschou HO, Olsen TS. Factors delaying hospital admission in acute stroke: the Copenhagen stroke study. *Neurology* 1996; 47: 383–7.
4. Clark JM, Renier SA. A community stroke study: factors influencing stroke awareness and hospital arrival time. *J Stroke Cerebrovasc Dis* 2001; 10: 274–8.
5. Harraf F, Sharma A, Brown MM, Lees KR, Vass RI, Kalra L. A multicentre observational study of presentation and early assessment of acute stroke. *BMJ* 2002; 325: 17–21.
6. Reeves MJ, Hogan JG, Rafferty AP. Knowledge of stroke risk factors and warning signs among Michigan adults. *Neurology* 2002; 59: 1547–52.
7. Alkadry MG, Wilson C, Nicholas D. Stroke awareness among rural residents: the case of West Virginia. *Soc Work Health Care* 2005; 42: 73–92.
8. Samsa GP, Cohen SJ, Goldstein LB. Knowledge of risk among patients at increased risk for stroke. *Stroke* 1997; 28: 916–21.
9. Pancioli AM, Broderick J, Kothari R *et al.* Public perception of stroke warning signs and knowledge of potential risk factors. *JAMA* 1998; 279: 1288–92.
10. Segura T, Vega G, Lopez S, Rubio F, Castillo J. on behalf of the Cerebrovascular Diseases Study Group of the Spanish Society of Neurology. Public perception of stroke in Spain. *Cerebrovasc Dis* 2003; 16: 21–6.
11. Stern EB, Berhman M, Thomas JJ, Klassen AC. Community education for stroke awareness. An efficacy study. *Stroke* 1999; 30: 720–3.
12. Müller-Nordhorn J, Nolte CH, Rossnagel K *et al.* Knowledge about risk factors for stroke: a population-based survey with 28,090 participants. *Stroke* 2006; 37: 946–50.
13. Kim JS, Sung S, Yoon RN. Perspectives of stroke in persons living in Seoul, South Korea. *Stroke* 1997; 28: 1165–9.
14. Rowe AK, Frankel MR, Sanders KA. Stroke awareness among Georgia adults: epidemiology and considerations regarding measurement. *South Med J* 2001; 94: 613–8.
15. Silver F, Rubini F, Black D, Hodgson CS. Advertising strategies to increase public knowledge of the warning signs of stroke. *Stroke* 2003; 34: 1965–8.
16. Ferris A, Robertson RM, Fabunmi R, Mosca L. American Heart Association and American Stroke Association national survey of risk awareness among women. *Circulation* 2005; 111: 1321–6.
17. Cheung RTF, Li LSW, Mak W *et al.* Knowledge of stroke in Hong Kong. *Cerebrovasc Dis* 1999; 9: 119–23.
18. Jurkowski JM, Maniccia DM, Denninson BA, Samuels SJ, Spicer DA. Awareness of necessity to call 911 for stroke symptoms, upstate New York. *Prev Chronic Dis* 2008; 5: 2.
19. Hodgson C, Patrice L, Rubini F. Can mass media influence emergency department visits for stroke? *Stroke* 2007; 38: 2115–22.
20. Nicol MB, Thrift AG. Knowledge of risk factors and warning signs. *Vasc Health Risk Manag* 2005; 1: 137–47.
21. Rodgers H, Atkinson C, Bond S, Suddes M, Dobson R, Curless R. Randomized controlled trial of a comprehensive stroke education program for patients and caregivers. *Stroke* 1999; 30: 2585–91.
22. Williams LS, Bruno A, Rouch D, Marriott DJ. Stroke patients' knowledge of stroke. Influence on time to presentation. *Stroke* 1997; 28: 912–5.

23. Schneider AT, Pancioli AM, Khoury JC *et al.* Trends in community knowledge of the warning signs and risk factors for stroke. *JAMA* 2003; 289: 343–6.
24. Robles Y, Hawthorne K, Edwards AGK, Cannings-John R, Butler C. Health education for type 2 diabetes mellitus in ethnic minority groups. *Cochrane Database Syst Rev* 2007.
25. Rosenstock IM. Why people use health services. *Milbank Q* 2005; 83: 1–32.
26. Mechanic D. Social psychologic factors affecting the presentation of bodily complaints. *N Engl J Med* 1972; 286: 1132–9.
27. Greenlund KJ, Neff LJ, Zheng Zhi-Jie *et al.* Low public recognition of major stroke symptoms. *Am J Prev Med* 2003; 25: 315–9.
28. Johnston SC, Fayad PB, Gorelick PB *et al.* Prevalence and knowledge of transient ischaemic attack among US adults. *Neurology* 2003; 60: 1429–34.
29. Howard G, Howard VJ. REasons for Geographic And Racial Differences in Stroke (REGARDS) Investigators. Ethnic disparities in stroke: the scope of the problem. *Ethn Dis* 2001; 11: 761–8.
30. Das K, Mondal GP, Dutta AK, Mukherjee B, Mukherjee BB. Awareness of warning symptoms and risk factors of stroke in the general population and in stroke survivors. *J Clin Neurosci* 2007; 14: 12–6.

**Received 9 April 2009; accepted in revised form 26 August 2009**
